# Supplementary material for: On the Thermochemical Transition Depression of Cellulose Acetate Composite Membranes
Source: MDPI journal article supplement (doi:10.3390/polym14163434), 2022-08-22
Supplement: s1 [file s1]

## Supporting information for

# On the thermochemical transition depression of cellulose acetate composite membranes

Costas Tsiptsias<sup>1</sup>, George-Romanos P. Foukas<sup>1</sup>, Savvina-Maria Papaioannou<sup>1</sup>, Evangelos Tzimpilis<sup>1</sup> and Ioannis Tsivintzelis<sup>1\*</sup>

<sup>1</sup> Department of Chemical Engineering, Aristotle University of Thessaloniki, University Campus, GR-54124 Thessaloniki, Central Macedonia, Greece; ktsiopts@gmail.com (C.T.); grfoukas@gmail.com (G.-R. F.); savina94@gmail.com (S.-M. P.); tzimpi@auth.gr (E.T.)

\* Correspondence: tioannis@cheng.auth.gr (I.T.)

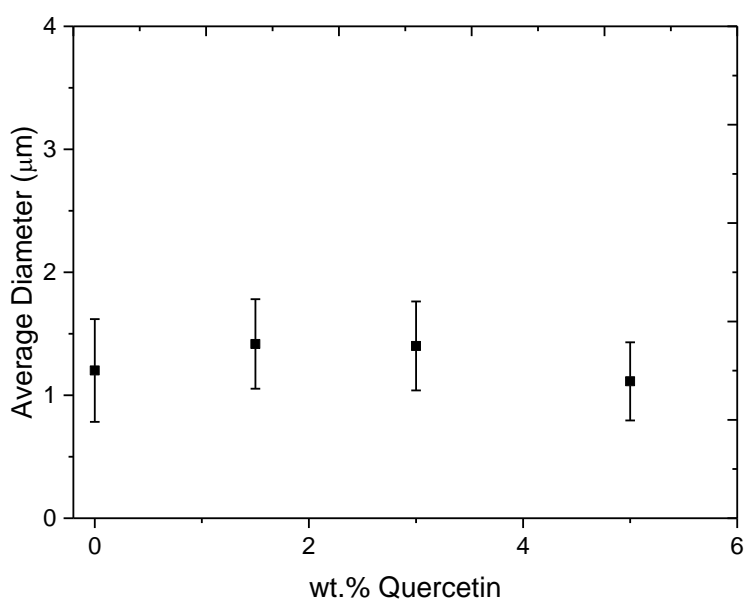

**Figure S1.** Average fiber diameters for membranes containing 0.0, 1.5, 3.0 and 5.0 %wt. quercetin.

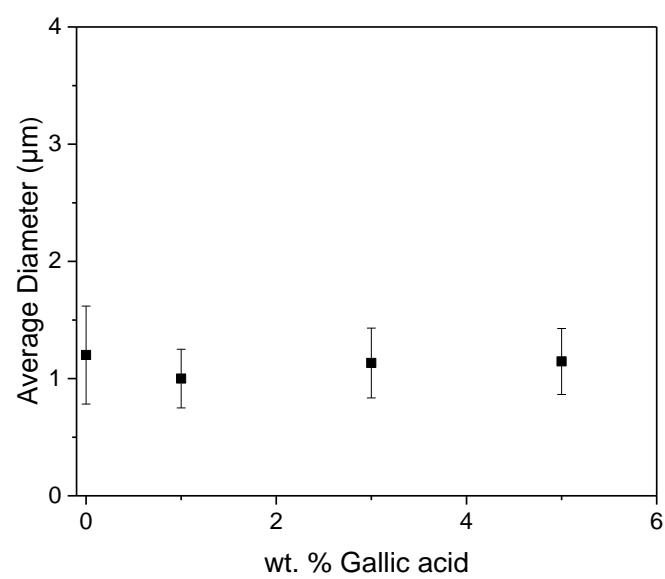

**Figure S2.** Average fiber diameters for membranes containing 0.0, 1, 3.0 and 5.0 %wt. gallic acid.
